# Supplementary material
Source: MDPI journal article supplement (https://www.mdpi.com/2311-7524/10/5/506)
Supplement: s1 [file s1]

## Supplemental materials

Table S1. Summary of RNA-Seq results

Table S2. The top 30 of up regulated DEGs of gene ontology in group HP vs TP

Table S3. The top 30 of up regulated DEGs of gene ontology in group NP vs TP

Table S4. The top 20 of up regulated DEGs of KEGG in group HP vs TP

Table S5. The top 20 of up regulated DEGs of KEGG in group NP vs TP

Table S1. Summary of RNA-Seq results

| Sample | Raw Reads<br>(M) | Clean Reads<br>(M) | Clean Bases<br>(G) | Q30 (%) | GC (%) | Total mapped ratio (%) |
|--------|------------------|--------------------|--------------------|---------|--------|------------------------|
| NP1    | 48.64            | 47.32              | 6.70               | 92.87   | 44.91  | 96.87                  |
| NP2    | 48.80            | 47.3               | 6.70               | 92.75   | 44.95  | 96.79                  |
| NP3    | 50.52            | 49.12              | 6.96               | 92.75   | 44.93  | 96.79                  |
| HP1    | 47.13            | 45.73              | 6.47               | 92.86   | 45.03  | 96.89                  |
| HP2    | 47.65            | 46.12              | 6.49               | 92.78   | 44.82  | 96.94                  |
| HP3    | 47.83            | 46.61              | 6.64               | 92.78   | 44.91  | 97.20                  |
| TP1    | 47.60            | 46.14              | 6.47               | 92.92   | 44.99  | 96.88                  |
| TP2    | 50.70            | 49.23              | 6.94               | 92.92   | 45.12  | 96.93                  |
| TP3    | 51.07            | 49.43              | 6.96               | 92.68   | 45.18  | 96.92                  |

Table S2. The top 30 of up regulated DEGs of gene ontology in group HP vs TP

| Id         | Term                                                                                     | Category    | ListHits | p-value     | Enrichment score | geneID                                               |
|------------|------------------------------------------------------------------------------------------|-------------|----------|-------------|------------------|------------------------------------------------------|
| GO:0010226 | response to lithium ion                                                                  | biological_ | 2        | 4.75E-05    | 187.9906323      | <i>Pg_S1983.2;Pg_S6590.1</i>                         |
| GO:0016051 | carbohydrate                                                                             | process     | 2        | 0.000235549 | 87.72896175      | <i>Pg_S0007.3;Pg_S0368.2</i>                         |
| GO:0016042 | biosynthetic process                                                                     | biological_ | 4        | 0.001100585 | 8.861511288      | <i>Pg_S0093.55;Pg_S1983.2;Pg_S6336.2;Pg_S6590.1</i>  |
| GO:0006000 | lipid catabolic process                                                                  | process     | 2        | 0.001384556 | 36.55373406      | <i>Pg_S0007.3;Pg_S0368.2</i>                         |
| GO:0009838 | fructose metabolic process                                                               | biological_ | 1        | 0.007576475 | 131.5934426      | <i>Pg_S7392.1</i>                                    |
| GO:0019252 | abscission                                                                               | process     | 2        | 0.008893983 | 14.14983254      | <i>Pg_S0007.3;Pg_S0368.2</i>                         |
| GO:0007091 | starch biosynthetic process                                                              | biological_ | 1        | 0.010591231 | 93.99531616      | <i>Pg_S1646.4</i>                                    |
| GO:0010922 | metaphase/anaphase transition of mitotic cell cycle                                      | process     | 1        | 0.010591231 | 93.99531616      | <i>Pg_S6577.8</i>                                    |
| GO:0042326 | positive regulation of phosphatase activity                                              | biological_ | 1        | 0.010591231 | 93.99531616      | <i>Pg_S6577.8</i>                                    |
| GO:0009751 | negative regulation of phosphorylation                                                   | process     | 3        | 0.011401985 | 6.450658952      | <i>Pg_S0055.11;Pg_S1983.2;Pg_S6590.1</i>             |
| GO:0031410 | response to salicylic acid                                                               | biological_ | 3        | 0.000243277 | 24.9860967       | <i>Pg_S0637.13;Pg_S1015.3;Pg_S2513.2</i>             |
| GO:0009705 | cytoplasmic vesicle                                                                      | cellular_co | 4        | 0.000945106 | 9.234627552      | <i>Pg_S2763.11;Pg_S3162.8;Pg_S4250.10;Pg_S7392.1</i> |
| GO:0000323 | plant-type vacuole membrane                                                              | mponent     | 1        | 0.013596978 | 73.10746812      | <i>Pg_S0055.11</i>                                   |
| GO:0000325 | lytic vacuole                                                                            | cellular_co | 2        | 0.015151578 | 10.69865387      | <i>Pg_S3162.8;Pg_S4250.10</i>                        |
| GO:0031428 | plant-type vacuole                                                                       | mponent     | 1        | 0.028491511 | 34.62985332      | <i>Pg_S3834.4</i>                                    |
| GO:0048226 | box C/D snoRNP complex                                                                   | cellular_co | 1        | 0.029968741 | 32.89836066      | <i>Pg_S3518.15</i>                                   |
| GO:0005749 | Casparian strip                                                                          | mponent     | 1        | 0.031443761 | 31.33177205      | <i>Pg_S3342.1</i>                                    |
| GO:0045273 | mitochondrial respiratory chain complex II, succinate dehydrogenase complex (ubiquinone) | cellular_co | 1        | 0.031443761 | 31.33177205      | <i>Pg_S3342.1</i>                                    |
| GO:0000326 | respiratory chain complex II                                                             | mponent     | 1        | 0.035855597 | 27.41530055      | <i>Pg_S0055.11</i>                                   |
|            | protein storage vacuole                                                                  | cellular_co |          |             |                  |                                                      |
|            |                                                                                          | mponent     |          |             |                  |                                                      |

|            |                                                   |                    |   |             |             |                                          |
|------------|---------------------------------------------------|--------------------|---|-------------|-------------|------------------------------------------|
| GO:0005680 | anaphase-promoting complex                        | cellular_component | 1 | 0.038785833 | 25.30643127 | <i>Pg_S1646.4</i>                        |
| GO:0008234 | cysteine-type peptidase activity                  | molecular_function | 3 | 0.000156019 | 29.02796528 | <i>Pg_S0637.13;Pg_S1015.3;Pg_S2513.2</i> |
| GO:0016788 | hydrolase activity, acting on ester bonds         | molecular_function | 3 | 0.001601162 | 13.07219629 | <i>Pg_S1983.2;Pg_S6336.2;Pg_S6590.1</i>  |
| GO:0019200 | carbohydrate kinase activity                      | molecular_function | 2 | 0.001707527 | 32.89836066 | <i>Pg_S0007.3;Pg_S0368.2</i>             |
| GO:0008865 | fructokinase activity                             | molecular_function | 2 | 0.002252523 | 28.60727014 | <i>Pg_S0007.3;Pg_S0368.2</i>             |
| GO:0008309 | double-stranded DNA exodeoxyribonuclease activity | molecular_function | 1 | 0.007576475 | 131.5934426 | <i>Pg_S7228.3</i>                        |
| GO:0034002 | (R)-limonene synthase activity                    | molecular_function | 1 | 0.007576475 | 131.5934426 | <i>Pg_S2552.4</i>                        |
| GO:0043765 | T/G mismatch-specific endonuclease activity       | molecular_function | 1 | 0.007576475 | 131.5934426 | <i>Pg_S7228.3</i>                        |
| GO:0000104 | succinate dehydrogenase activity                  | molecular_function | 1 | 0.009084981 | 109.6612022 | <i>Pg_S3342.1</i>                        |
| GO:0008177 | succinate dehydrogenase (ubiquinone) activity     | molecular_function | 1 | 0.009084981 | 109.6612022 | <i>Pg_S3342.1</i>                        |
| GO:0019902 | phosphatase binding                               | molecular_function | 1 | 0.010591231 | 93.99531616 | <i>Pg_S6577.8</i>                        |

Table S3. The top 30 of up regulated DEGs of gene ontology in group NP vs TP

| Id         | Term                                                             | Category           | ListHits | p-value     | Enrichment score | geneID                                                                                                                                                      |
|------------|------------------------------------------------------------------|--------------------|----------|-------------|------------------|-------------------------------------------------------------------------------------------------------------------------------------------------------------|
| GO:0030643 | cellular phosphate ion homeostasis                               | biological_process | 4        | 1.61E-08    | 121.993921       | <i>Pg_S0930.37;Pg_S1865.23;Pg_S3218.5;Pg_S6826.5</i>                                                                                                        |
| GO:0006071 | glycerol metabolic process                                       | biological_process | 4        | 0.000173497 | 14.47385503      | <i>Pg_S0930.37;Pg_S1865.23;Pg_S3218.5;Pg_S6826.5</i>                                                                                                        |
| GO:0009737 | response to abscisic acid                                        | biological_process | 13       | 0.00026578  | 3.175471055      | <i>Pg_S0015.23;Pg_S0086.24;Pg_S0271.2;Pg_S0386.12;Pg_S0519.15;Pg_S2035.9;Pg_S2835.16;Pg_S2984.3;Pg_S3260.5;Pg_S5077.6;Pg_S5400.12;Pg_S5778.1;Pg_S6098.1</i> |
| GO:0006979 | response to oxidative stress                                     | biological_process | 9        | 0.000314127 | 4.232167963      | <i>Pg_S0374.50;Pg_S1619.2;Pg_S2116.17;Pg_S3099.12;Pg_S3152.4;Pg_S3511.16;Pg_S5778.1;Pg_S6529.2;Pg_S9260.2</i>                                               |
| GO:0080040 | positive regulation of cellular response to phosphate starvation | biological_process | 2        | 0.000323341 | 71.16312057      | <i>Pg_S3574.8;Pg_S4039.5</i>                                                                                                                                |
| GO:0010226 | response to lithium ion                                          | biological_process | 2        | 0.000451281 | 60.99696049      | <i>Pg_S1983.2;Pg_S6590.1</i>                                                                                                                                |
| GO:0016036 | cellular response to phosphate starvation                        | biological_process | 5        | 0.000753011 | 7.069184162      | <i>Pg_S2471.12;Pg_S3574.8;Pg_S4039.5;Pg_S4611.1;Pg_S9493.1</i>                                                                                              |
| GO:0016114 | terpenoid biosynthetic process                                   | biological_process | 3        | 0.001409243 | 13.62698053      | <i>Pg_S0639.1;Pg_S3711.2;Pg_S7152.2</i>                                                                                                                     |

|            |                                                                                                       |                    |    |             |             |                                                                                                                                                                                                                                           |
|------------|-------------------------------------------------------------------------------------------------------|--------------------|----|-------------|-------------|-------------------------------------------------------------------------------------------------------------------------------------------------------------------------------------------------------------------------------------------|
| GO:0006817 | phosphate ion transport                                                                               | biological_process | 3  | 0.001785241 | 12.55819775 | <i>Pg_S0519.15;Pg_S2471.12;Pg_S2984.3</i>                                                                                                                                                                                                 |
| GO:0046244 | salicylic acid catabolic process                                                                      | biological_process | 2  | 0.001913769 | 30.49848024 | <i>Pg_S0219.9;Pg_S2438.4</i>                                                                                                                                                                                                              |
| GO:0005576 | extracellular region                                                                                  | cellular_component | 20 | 4.64E-06    | 3.224914829 | <i>Pg_S0123.13;Pg_S0144.17;Pg_S0253.12;Pg_S0274.4;Pg_S0374.50;Pg_S0769.1;Pg_S1619.2;Pg_S1983.2;Pg_S2116.17;Pg_S2207.36;Pg_S2400.1;Pg_S3152.4;Pg_S3247.3;Pg_S3506.2;Pg_S4721.2;Pg_S5400.12;Pg_S5631.1;Pg_S6257.2;Pg_S6590.1;Pg_S9260.2</i> |
| GO:0005618 | cell wall                                                                                             | cellular_component | 15 | 0.000337953 | 2.806608611 | <i>Pg_S0123.13;Pg_S0144.17;Pg_S0349.1;Pg_S0760.2;Pg_S0769.1;Pg_S1619.2;Pg_S2400.1;Pg_S2901.1;Pg_S3152.4;Pg_S3247.3;Pg_S3506.2;Pg_S4721.2;Pg_S5400.12;Pg_S6001.10;Pg_S6257.2</i>                                                           |
| GO:0005887 | integral component of plasma membrane                                                                 | cellular_component | 5  | 0.011139696 | 3.758615523 | <i>Pg_S1530.3;Pg_S3260.5;Pg_S4898.14;Pg_S7757.1;Pg_S8289.3</i>                                                                                                                                                                            |
| GO:1990298 | bub1-bub3 complex                                                                                     | cellular_component | 1  | 0.027779095 | 35.58156028 | <i>Pg_S5702.2</i>                                                                                                                                                                                                                         |
| GO:0005773 | vacuole                                                                                               | cellular_component | 10 | 0.035366823 | 1.939049607 | <i>Pg_S0103.3;Pg_S0349.1;Pg_S0519.15;Pg_S1619.2;Pg_S2447.1;Pg_S2468.26;Pg_S2984.3;Pg_S5400.12;Pg_S5860.6;Pg_S8289.3</i>                                                                                                                   |
| GO:0033597 | mitotic checkpoint complex                                                                            | cellular_component | 1  | 0.036867142 | 26.68617021 | <i>Pg_S5702.2</i>                                                                                                                                                                                                                         |
| GO:0005905 | clathrin-coated pit                                                                                   | cellular_component | 2  | 0.045045217 | 5.930260047 | <i>Pg_S1485.7;Pg_S2386.14</i>                                                                                                                                                                                                             |
| GO:0005828 | kinetochore microtubule                                                                               | cellular_component | 1  | 0.045870684 | 21.34893617 | <i>Pg_S5702.2</i>                                                                                                                                                                                                                         |
| GO:0031410 | cytoplasmic vesicle                                                                                   | cellular_component | 2  | 0.053165816 | 5.404793967 | <i>Pg_S1015.3;Pg_S2513.2</i>                                                                                                                                                                                                              |
| GO:0005816 | spindle pole body                                                                                     | cellular_component | 1  | 0.059219258 | 16.42225859 | <i>Pg_S1749.17</i>                                                                                                                                                                                                                        |
| GO:0008889 | glycerophosphodiester phosphodiesterase activity                                                      | molecular_function | 4  | 1.06E-06    | 50.23279099 | <i>Pg_S0930.37;Pg_S1865.23;Pg_S3218.5;Pg_S6826.5</i>                                                                                                                                                                                      |
| GO:0033759 | flavone synthase activity                                                                             | molecular_function | 2  | 0.000323341 | 71.16312057 | <i>Pg_S0219.9;Pg_S2438.4</i>                                                                                                                                                                                                              |
| GO:0034785 | salicylate 5-hydroxylase activity                                                                     | molecular_function | 2  | 0.000323341 | 71.16312057 | <i>Pg_S0219.9;Pg_S2438.4</i>                                                                                                                                                                                                              |
| GO:0020037 | heme binding                                                                                          | molecular_function | 11 | 0.000335385 | 3.520814061 | <i>Pg_S0266.27;Pg_S0374.50;Pg_S0762.28;Pg_S1157.11;Pg_S1619.2;Pg_S1952.7;Pg_S2116.17;Pg_S2275.6;Pg_S3716.6;Pg_S5024.11;Pg_S9260.2</i>                                                                                                     |
| GO:0004497 | monooxygenase activity                                                                                | molecular_function | 8  | 0.000558709 | 4.356925749 | <i>Pg_S0252.42;Pg_S0266.27;Pg_S0762.28;Pg_S1157.11;Pg_S1952.7;Pg_S2275.6;Pg_S2835.16;Pg_S5024.11</i>                                                                                                                                      |
| GO:0045549 | 9-cis-epoxycarotenoid dioxygenase activity                                                            | molecular_function | 2  | 0.002201403 | 28.46524823 | <i>Pg_S1728.5;Pg_S5203.1</i>                                                                                                                                                                                                              |
| GO:0010436 | carotenoid dioxygenase activity                                                                       | molecular_function | 2  | 0.002833837 | 25.11639549 | <i>Pg_S1728.5;Pg_S5203.1</i>                                                                                                                                                                                                              |
| GO:0016705 | oxidoreductase activity, acting on paired donors, with incorporation or reduction of molecular oxygen | molecular_function | 6  | 0.00292232  | 4.298443524 | <i>Pg_S0266.27;Pg_S0762.28;Pg_S1157.11;Pg_S1952.7;Pg_S2275.6;Pg_S5024.11</i>                                                                                                                                                              |
| GO:0000287 | magnesium ion binding                                                                                 | molecular_function | 7  | 0.004227543 | 3.491648439 | <i>Pg_S0491.1;Pg_S0639.1;Pg_S0930.37;Pg_S1865.23;Pg_S3218.5;Pg_S3711.2;Pg_S6826.5</i>                                                                                                                                                     |

GO:0004553    hydrolase activity,  
hydrolyzing O-glycosyl  
compounds    molecular\_f  
unction    3    0.004397374    9.149544073    *Pg\_S0760.2;Pg\_S5075.8;Pg\_S6001.10*

Table S4. The top 20 of up regulated DEGs of KEGG in group HP vs TP

| Id      | Term                                        | Classification level1                | Classification level2                | ListHits | p-value  | Enrichment score | geneID                        | hyperlink only excel |
|---------|---------------------------------------------|--------------------------------------|--------------------------------------|----------|----------|------------------|-------------------------------|----------------------|
| ko03008 | Ribosome biogenesis in eukaryotes           | Genetic Information Processing       | Translation                          | 2        | 0.027715 | 7.582054         | <i>Pg_S3834.4;Pg_S5175.1</i>  | ko03008              |
| ko00750 | Vitamin B6 metabolism                       | Metabolism                           | Metabolism of cofactors and vitamins | 1        | 0.052131 | 18.72303         | <i>Pg_S6053.3</i>             | ko00750              |
| ko00520 | Amino sugar and nucleotide sugar metabolism | Metabolism                           | Carbohydrate metabolism              | 2        | 0.053465 | 5.287773         | <i>Pg_S0368.2;Pg_S1347.27</i> | ko00520              |
| ko00073 | Cutin, suberine and wax biosynthesis        | Metabolism                           | Lipid metabolism                     | 1        | 0.067578 | 14.33482         | <i>Pg_S2835.16</i>            | ko00073              |
| ko00260 | Glycine, serine and threonine metabolism    | Metabolism                           | Amino acid metabolism                | 1        | 0.186607 | 4.879939         | <i>Pg_S1096.2</i>             | ko00260              |
| ko03050 | Proteasome                                  | Genetic Information Processing       | Folding, sorting and degradation     | 1        | 0.191096 | 4.753516         | <i>Pg_S0303.1</i>             | ko03050              |
| ko00051 | Fructose and mannose metabolism             | Metabolism                           | Carbohydrate metabolism              | 1        | 0.191991 | 4.729013         | <i>Pg_S0368.2</i>             | ko00051              |
| ko00020 | Citrate cycle (TCA cycle)                   | Metabolism                           | Carbohydrate metabolism              | 1        | 0.203545 | 4.432022         | <i>Pg_S3342.1</i>             | ko00020              |
| ko00630 | Glyoxylate and dicarboxylate metabolism     | Metabolism                           | Carbohydrate metabolism              | 1        | 0.218422 | 4.095663         | <i>Pg_S1096.2</i>             | ko00630              |
| ko04120 | Ubiquitin mediated proteolysis              | Genetic Information Processing       | Folding, sorting and degradation     | 1        | 0.293767 | 2.912472         | <i>Pg_S3592.1</i>             | ko04120              |
| ko00190 | Oxidative phosphorylation                   | Metabolism                           | Energy metabolism                    | 1        | 0.317088 | 2.659213         | <i>Pg_S3342.1</i>             | ko00190              |
| ko00500 | Starch and sucrose metabolism               | Metabolism                           | Carbohydrate metabolism              | 1        | 0.369464 | 2.205357         | <i>Pg_S0368.2</i>             | ko00500              |
| ko04626 | Plant-pathogen interaction                  | Organismal Systems                   | Environmental adaptation             | 1        | 0.406102 | 1.956138         | <i>Pg_S6285.3</i>             | ko04626              |
| ko04144 | Endocytosis                                 | Cellular Processes                   | Transport and catabolism             | 1        | 0.420721 | 1.86849          | <i>Pg_S0226.20</i>            | ko04144              |
| ko03040 | Spliceosome                                 | Genetic Information Processing       | Transcription                        | 1        | 0.494753 | 1.50152          | <i>Pg_S3683.10</i>            | ko03040              |
| ko04075 | Plant hormone signal transduction           | Environmental Information Processing | Signal transduction                  | 1        | 0.500508 | 1.477341         | <i>Pg_S1844.26</i>            | ko04075              |

Table S5. The top 20 of up regulated DEGs of KEGG in group NP vs TP

| Id      | Term                                                                 | Classification_1<br>evel1                  | Classification_1<br>evel2                         | ListH<br>its | p-<br>value  | Enrichment_s<br>core | geneID                                                                                                   | hyperlink_only_<br>excel |
|---------|----------------------------------------------------------------------|--------------------------------------------|---------------------------------------------------|--------------|--------------|----------------------|----------------------------------------------------------------------------------------------------------|--------------------------|
| ko00940 | Phenylpropanoi<br>d biosynthesis                                     | Metabolism                                 | Biosynthesis of<br>other secondary<br>metabolites | 8            | 5.38E-<br>05 | 5.890392             | <i>Pg_S0123.13;Pg_S0266.27;Pg_S0374.50;Pg_S0762.28;Pg_S1619.2;Pg_S2116.17<br/>;Pg_S3506.2;Pg_S9260.2</i> | ko00940                  |
| ko00564 | Glycerophosph<br>olipid<br>metabolism                                | Metabolism                                 | Lipid<br>metabolism                               | 4            | 0.0224<br>97 | 3.704911             | <i>Pg_S0930.37;Pg_S1865.23;Pg_S3218.5;Pg_S6826.5</i>                                                     | ko00564                  |
| ko00909 | Sesquiterpenoid<br>and triterpenoid<br>biosynthesis                  | Metabolism                                 | Metabolism of<br>terpenoids and<br>polyketides    | 2            | 0.0226<br>14 | 8.594179             | <i>Pg_S0639.1;Pg_S3711.2</i>                                                                             | ko00909                  |
| ko00945 | Stilbenoid,<br>diarylheptanoid<br>and gingerol<br>biosynthesis       | Metabolism                                 | Biosynthesis of<br>other secondary<br>metabolites | 2            | 0.0240<br>18 | 8.321348             | <i>Pg_S0266.27;Pg_S0762.28</i>                                                                           | ko00945                  |
| ko00941 | Flavonoid<br>biosynthesis                                            | Metabolism                                 | Biosynthesis of<br>other secondary<br>metabolites | 2            | 0.0398<br>9  | 6.316204             | <i>Pg_S0266.27;Pg_S0762.28</i>                                                                           | ko00941                  |
| ko00906 | Carotenoid<br>biosynthesis                                           | Metabolism                                 | Metabolism of<br>terpenoids and<br>polyketides    | 2            | 0.0416<br>48 | 6.167587             | <i>Pg_S1728.5;Pg_S5203.1</i>                                                                             | ko00906                  |
| ko00130 | Ubiquinone and<br>other terpenoid-<br>quinone<br>biosynthesis        | Metabolism                                 | Metabolism of<br>cofactors and<br>vitamins        | 2            | 0.0499<br>09 | 5.577073             | <i>Pg_S0266.27;Pg_S0762.28</i>                                                                           | ko00130                  |
| ko00350 | Tyrosine<br>metabolism                                               | Metabolism                                 | Amino acid<br>metabolism                          | 2            | 0.0499<br>09 | 5.577073             | <i>Pg_S0500.38;Pg_S2707.6</i>                                                                            | ko00350                  |
| ko00710 | Carbon fixation<br>in<br>photosynthetic<br>organisms                 | Metabolism                                 | Energy<br>metabolism                              | 3            | 0.0560<br>24 | 3.44898              | <i>Pg_S0813.6;Pg_S4064.8;Pg_S5244.3</i>                                                                  | ko00710                  |
| ko00604 | Glycosphingoli<br>pid biosynthesis<br>- ganglio series               | Metabolism                                 | Glycan<br>biosynthesis<br>and metabolism          | 1            | 0.0665<br>31 | 14.56236             | <i>Pg_S3630.2</i>                                                                                        | ko00604                  |
| ko00010 | Glycolysis /<br>Gluconeogenesi<br>s                                  | Metabolism                                 | Carbohydrate<br>metabolism                        | 4            | 0.0694<br>61 | 2.569828             | <i>Pg_S0491.1;Pg_S0813.6;Pg_S2707.6;Pg_S4064.8</i>                                                       | ko00010                  |
| ko04075 | Plant hormone<br>signal<br>transduction                              | Environmental<br>Information<br>Processing | Signal<br>transduction                            | 5            | 0.0866<br>4  | 2.110487             | <i>Pg_S2566.5;Pg_S4931.9;Pg_S5077.6;Pg_S5602.1;Pg_S6397.3</i>                                            | ko04075                  |
| ko00592 | alpha-Linolenic<br>acid<br>metabolism                                | Metabolism                                 | Lipid<br>metabolism                               | 2            | 0.1044<br>31 | 3.64059              | <i>Pg_S0615.14;Pg_S2707.6</i>                                                                            | ko00592                  |
| ko00603 | Glycosphingoli<br>pid biosynthesis<br>- globo and<br>isoglobo series | Metabolism                                 | Glycan<br>biosynthesis<br>and metabolism          | 1            | 0.1118<br>64 | 8.455563             | <i>Pg_S3630.2</i>                                                                                        | ko00603                  |

|         |                                          |            |                                      |   |          |          |                               |         |
|---------|------------------------------------------|------------|--------------------------------------|---|----------|----------|-------------------------------|---------|
| ko00591 | Linoleic acid metabolism                 | Metabolism | Lipid metabolism                     | 1 | 0.118644 | 7.943105 | <i>Pg_S3814.3</i>             | ko00591 |
| ko00531 | Glycosaminoglycan degradation            | Metabolism | Glycan biosynthesis and metabolism   | 1 | 0.164706 | 5.577073 | <i>Pg_S3630.2</i>             | ko00531 |
| ko00760 | Nicotinate and nicotinamide metabolism   | Metabolism | Metabolism of cofactors and vitamins | 1 | 0.171091 | 5.349438 | <i>Pg_S1174.9</i>             | ko00760 |
| ko00630 | Glyoxylate and dicarboxylate metabolism  | Metabolism | Carbohydrate metabolism              | 2 | 0.210348 | 2.340379 | <i>Pg_S0885.9;Pg_S3458.1</i>  | ko00630 |
| ko00040 | Pentose and glucuronate interconversions | Metabolism | Carbohydrate metabolism              | 2 | 0.217357 | 2.289279 | <i>Pg_S0144.17;Pg_S2400.1</i> | ko00040 |
| ko00073 | Cutin, suberine and wax biosynthesis     | Metabolism | Lipid metabolism                     | 1 | 0.217476 | 4.095663 | <i>Pg_S2835.16</i>            | ko00073 |
